# Supplementary material for: The TRACE-Seq method tracks recombination alleles and identifies clonal reconstitution dynamics of gene targeted human hematopoietic stem cells
Source: PubMed Central journal article supplement (PMC7817666; doi:10.1038/s41467-020-20792-y), 2021-01-20
Supplement: 41467_2020_20792_MOESM1_ESM.pdf [file 41467_2020_20792_MOESM1_ESM.pdf]

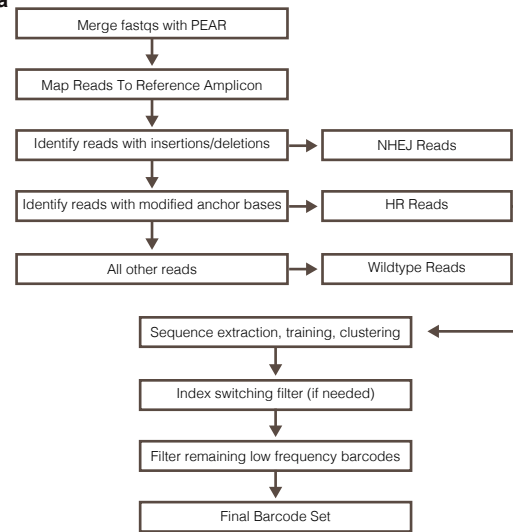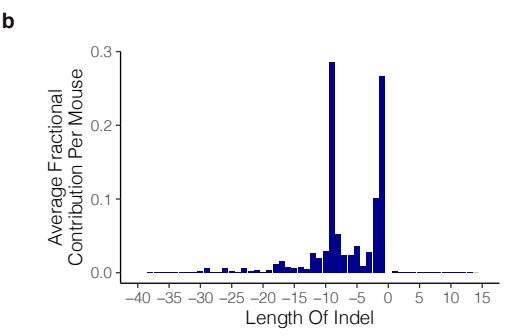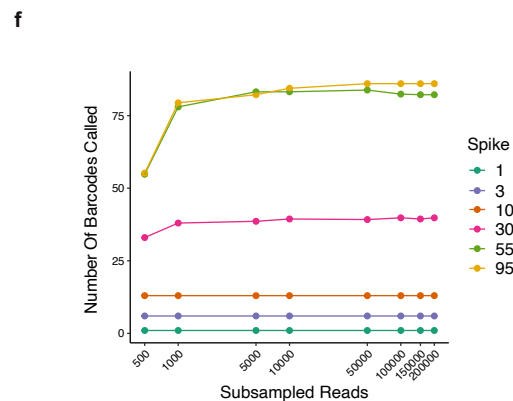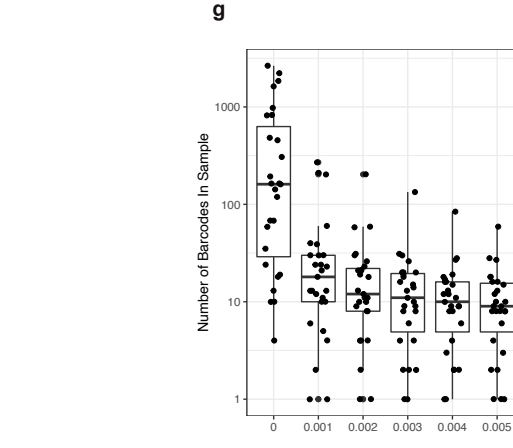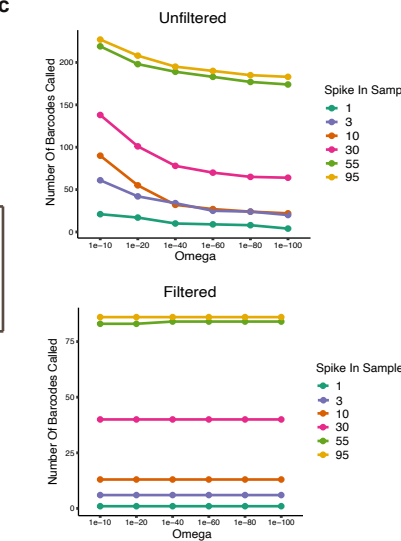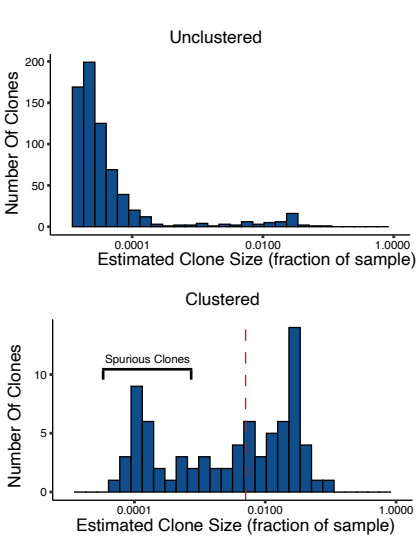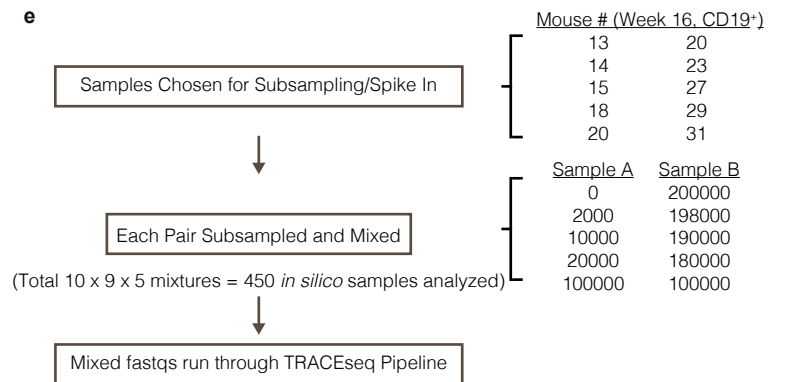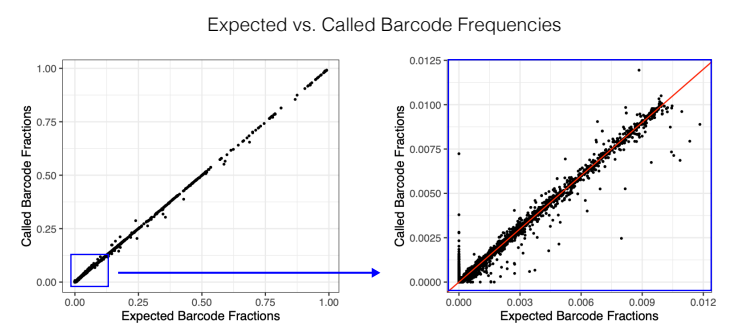

**Supplementary Figure 1: Barcode Analysis Pipeline Optimization**

**Supplementary Figure 1. TRACE-Seq barcode analysis pipeline and optimization. a Schematic of barcode calling pipeline workflow. b** Number of barcodes called from sequencing of spike-in samples (**Figure 1e**) as a function of the DADA2 Omega parameter before filtering barcodes <0.5% (top) and after filtering barcodes (bottom). **c** Distribution of barcode sizes for a sample with a known barcode content of 30 barcodes. Top: distribution of unclustered barcodes, showing large numbers of very infrequent sequences on the left side of the distribution. Bottom: distribution of clustered barcodes (bottom). Threshold of 0.5% is depicted by the dashed red line, which was used to enrich for “high confidence” barcodes in subsequent analyses. **d** Subsampling analysis of spike-in samples to estimate necessary sequencing depths to recover the expected numbers of barcodes. **e** In silico mixing of samples used as an alternative method to establish “high confidence” barcode frequencies. Samples mixed at indicated ratios and run through TRACE-seq pipeline. Bottom: Extremely high correlation between expected barcode fractions and results from in silico mixing. **f** Indel frequencies aggregated from all mice analyzed. **g** Total barcodes called as a function of “high confidence” barcode threshold (all Week 16 HBB mice depicted).

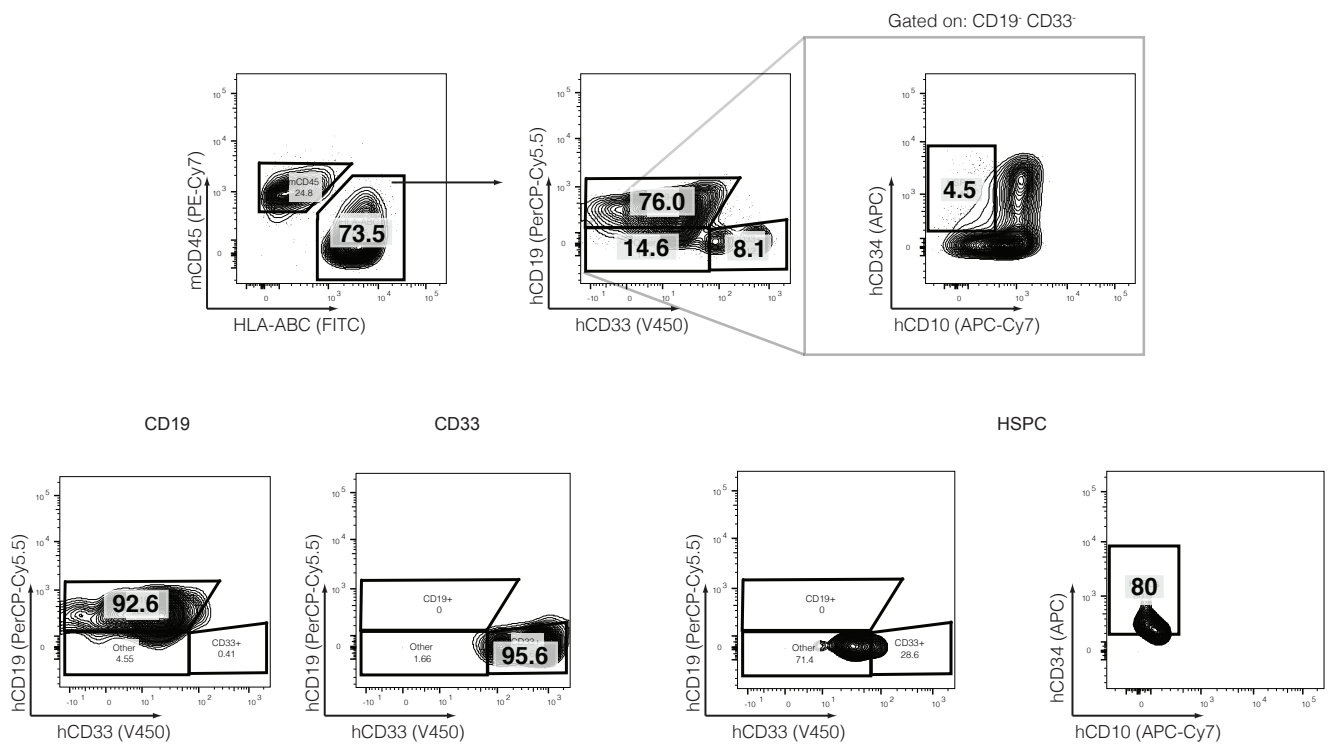

**Supplementary Figure 2** Representative HBB gating strategy (upper) and sort purity (lower) for CD19<sup>+</sup>, CD33<sup>+</sup>, and HSPCs (CD19<sup>+</sup>CD33<sup>+</sup>CD10<sup>+</sup>CD34<sup>+</sup>) populations.

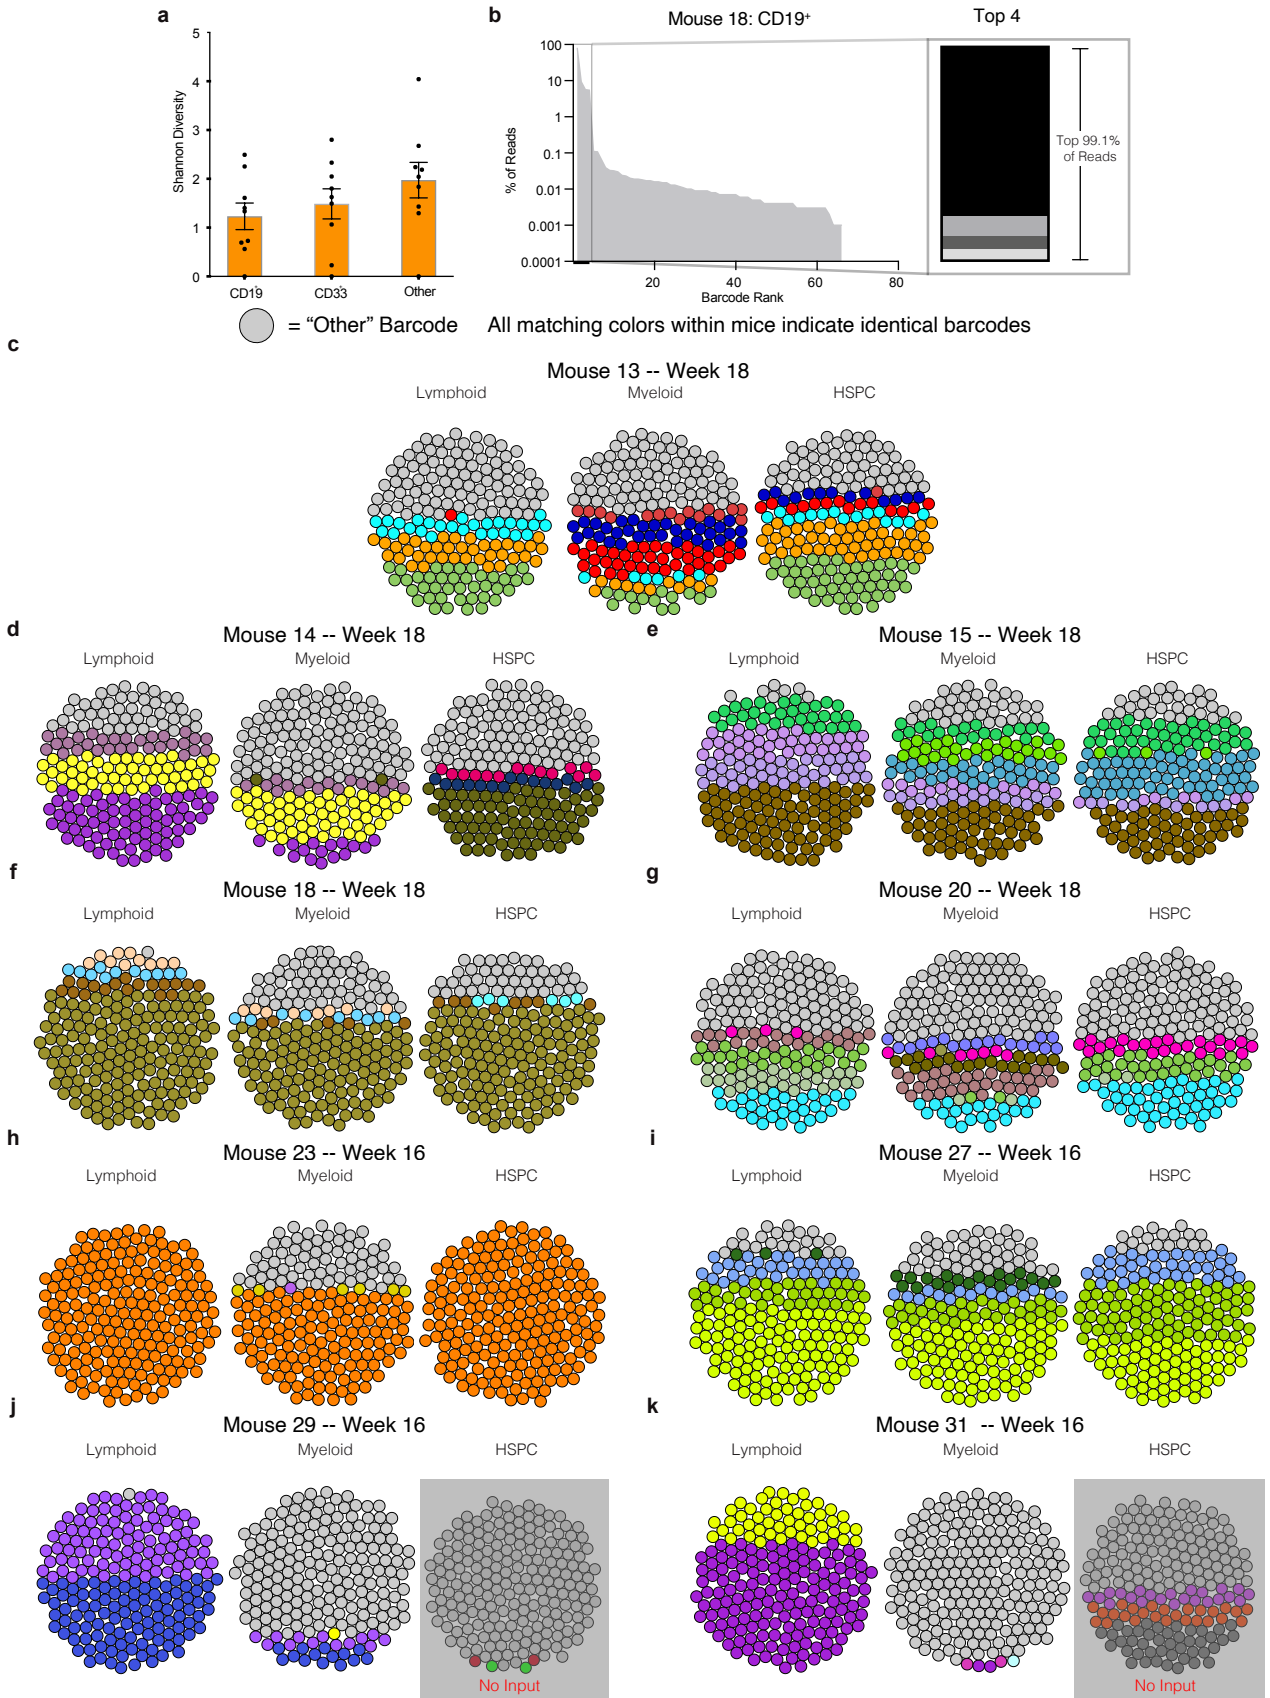

**Supplementary Figure 3. Bubble plots depicting shared and unique barcode representation in all HBB barcoded mice at sacrifice. a** Simpson diversity, representing barcode richness and evenness, for each lineage. **b** Left: representative quantification of all barcodes in descending order by read proportion. Right: Top four barcodes depicted as stacked bar chart. **c-k** Visualization of top 3 barcodes from all sorted populations (similar to **Figure 4a**) from indicated mice. All other barcodes represented as grey bubbles. Error bars depict mean  $\pm$  SEM. Note: Despite some colors appearing similar, no top barcodes are shared between distinct mice. See **Supplementary Table 3** for individual HBB sequences and barcode counts.



**Supplementary Figure 4. Engraftment clonality with genome edited HSPCs is independent of locus and barcode diversity.** **a** Top: Schema of AAVS1 locus and AAV6 donor containing SFFV-BFP-[barcode]-pA expression cassette. Bottom: Barcode region depicted in red, with a maximum theoretical diversity of  $3^{12} = 531,441$ . **b** Recovery of barcodes from untreated genomic DNA containing 1, 3, 10, and 30 individual plasmids containing BFP barcodes. **c** Total human engraftment in whole bone marrow collected 16-18 weeks post transplantation (expressed as proportion of human HLA-ABC<sup>+</sup> cells), left, and genome editing efficiency as measured by percentage of BFP<sup>+</sup> cells by flow cytometry, right. **d** Multi-lineage engraftment of human CD19<sup>+</sup> and CD33<sup>+</sup> lineages, left, with respective genome editing efficiencies, right. Error bars depict mean  $\pm$  SEM. **e** Example of gating on highly engrafted mouse on %BFP<sup>+</sup> within each lineage (left) and representative gating strategy and sort purity (right). **f** Barcodes from each subset were sorted from largest to smallest by percentage of reads. Depicted are the numbers of most abundant, unique barcode alleles comprising the top 50% and top 90% of reads from each lineage of all mice transplanted with BC donor edited HSPCs. Mean  $\pm$  SEM genomes analyzed from each group— CD19<sup>+</sup>: 7900  $\pm$  1500, CD33<sup>+</sup>: 10000  $\pm$  3000 (see **Supplementary Table 2**).

○ = "Other" Barcode      All matching colors within mice indicate identical barcodes

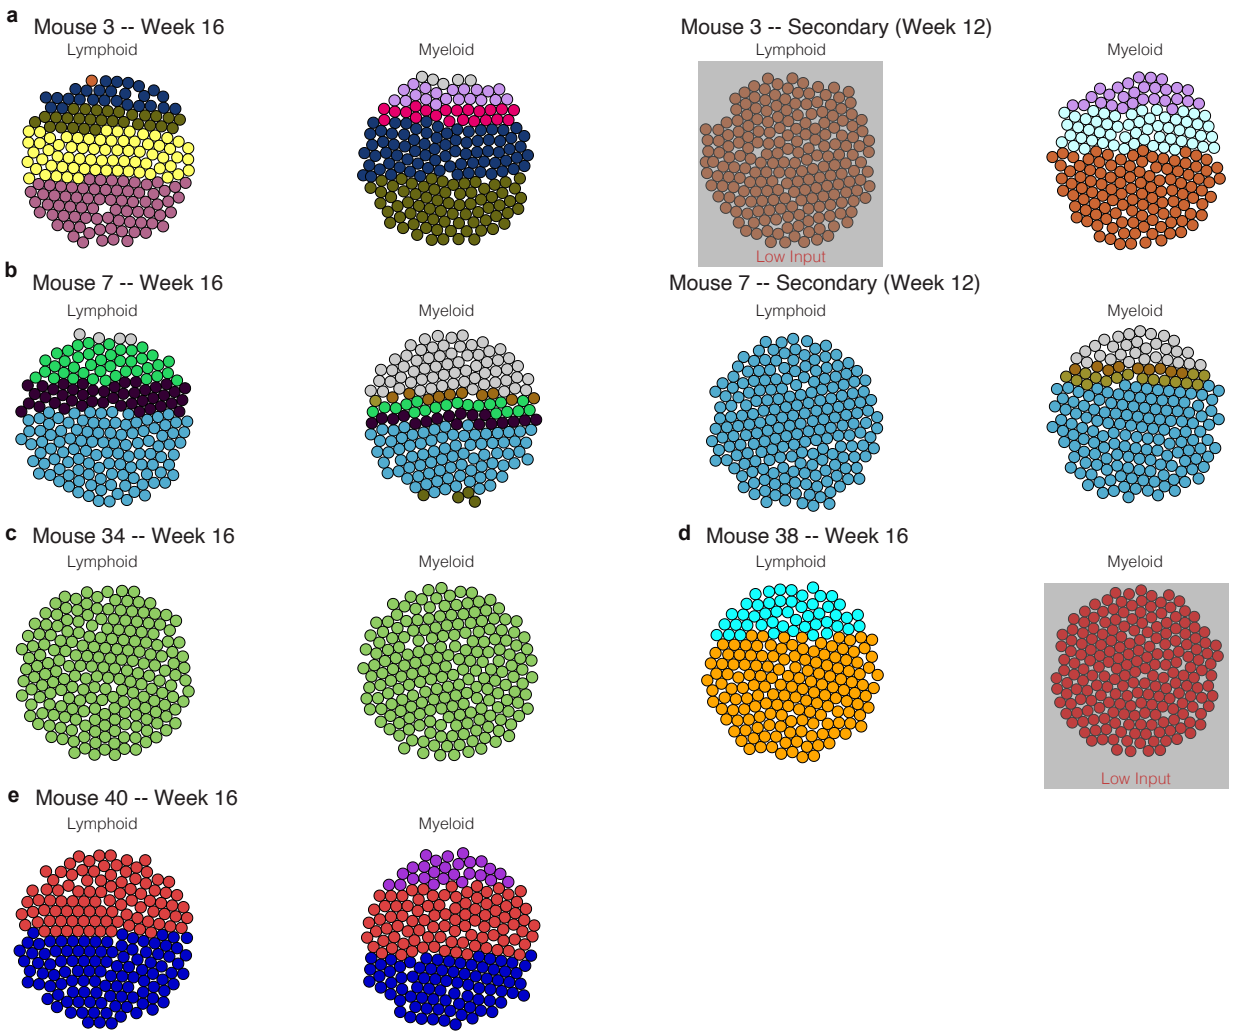

**Supplementary Figure 5** Bubble plots depicting shared and unique barcode representation in all BFP barcoded mice at sacrifice. **a-e** Visualization of top 3 barcodes from sorted populations (similar to **Figure 5a**) from indicated mice. All other barcodes

represented as grey bubbles. Despite some colors appearing similar, no top barcodes are shared between distinct mice. See **Supplementary Table 4** for individual BFP sequences and barcode counts.



**Supplementary Table 1. HBB barcodes identified in vitro, related to Figure 2c**

HBB In Vitro Treatment groups used in HBB in vitro experiments

| Biological Replicate | Barcode Pools | Count    |
|----------------------|---------------|----------|
| 1                    | non-BC        | 3.30E+05 |
| 1                    | BC1           | 3.30E+05 |
| 1                    | BC4           | 3.30E+05 |
| 2                    | non-BC        | 3.30E+05 |
| 2                    | BC1           | 3.30E+05 |
| 2                    | BC4           | 3.30E+05 |
| 3                    | non-BC        | 2.00E+05 |
| 3                    | BC1           | 2.00E+05 |
| 3                    | BC2           | 2.00E+05 |
| 3                    | BC4           | 2.00E+05 |
| 3                    | BC1/BC2/BC4   | 2.00E+05 |
| 4                    | non-BC        | 2.50E+05 |
| 4                    | BC1           | 2.50E+05 |
| 4                    | BC2           | 2.50E+05 |
| 4                    | BC4           | 2.50E+05 |
| 5                    | non-BC        | 2.50E+05 |
| 5                    | BC1           | 2.50E+05 |
| 5                    | BC2           | 2.50E+05 |
| 5                    | BC4           | 2.50E+05 |

Supplementary Table 2: HBB Barcodes identified In Vitro (Related to Figure 2c)

Day 2 No BC

| HbS | G | C | A | C | C | T | G | A | C | T | C | C | T | G | T | G | G | A | G | A | A | G | T | C | T | Read Percentage | aa seq     | correct aa |               |
|-----|---|---|---|---|---|---|---|---|---|---|---|---|---|---|---|---|---|---|---|---|---|---|---|---|---|-----------------|------------|------------|---------------|
| 1   | G | C | A | C | C | T | G | A | C | T | C | C | T | G | A | G | A | A | A | A | A | G | T | C | C | 93.51%          | VHLTPVEKSA | TRUE       |               |
| 2   | G | C | A | C | C | T | G | A | C | T | C | C | T | G | T | G | G | A | A | A | A | A | G | T | C | 1.89%           | VHLTPVEKSA | FALSE      | Sickle Allele |
| 3   | G | C | A | C | C | T | G | A | C | T | C | C | T | G | T | G | G | A | A | A | A | A | G | T | C | 0.81%           | VHLTPVEKSA | FALSE      | Sickle Allele |
| 4   | G | C | A | C | C | T | G | A | C | T | C | C | T | G | T | G | G | A | A | A | A | A | G | T | C | 0.46%           | VHLTPVEKSA | FALSE      | Sickle Allele |
| 5   | G | C | A | C | C | T | G | A | C | T | C | C | T | G | A | G | G | A | A | A | A | A | G | T | C | 0.33%           | AHLTPVEKSA | FALSE      |               |
| 6   | G | C | A | C | C | C | G | A | C | T | C | C | T | G | A | G | G | A | A | A | A | A | G | T | C | 0.32%           | VHPTPEEKSA | FALSE      |               |
| 7   | G | C | A | C | C | T | G | A | C | T | C | C | T | G | T | G | G | A | A | A | A | G | T | C | C | 0.31%           | VHLTPVEKSA | FALSE      | Sickle Allele |
| 8   | G | C | A | C | C | T | G | A | C | T | C | C | T | G | A | G | G | A | A | A | A | A | G | T | C | 0.26%           | VRLTPVEKSA | FALSE      |               |
| 9   | G | C | A | C | C | T | G | A | C | T | C | C | T | G | A | G | G | A | A | A | A | A | G | T | C | 0.25%           | VHLTPVEKSA | TRUE       |               |
| 10  | G | C | A | C | C | T | G | A | C | T | C | C | T | G | A | G | G | A | A | A | A | A | G | T | C | 0.22%           | VHLTPVEKSA | TRUE       |               |
| 11  | G | C | A | C | C | T | G | A | C | T | C | C | T | G | G | G | A | A | A | A | A | A | G | T | C | 0.20%           | VHLTPVEKSA | FALSE      |               |
| 12  | G | C | A | C | C | T | G | A | C | T | C | C | T | G | A | G | G | A | A | A | A | A | G | T | C | 0.19%           | VHLPVEKSA  | FALSE      |               |
| 13  | G | C | A | C | C | T | G | A | C | T | C | C | T | G | A | G | G | A | A | A | A | A | G | T | C | 0.18%           | VHLTPVEKSA | TRUE       |               |
| 14  | G | C | A | C | C | T | G | A | C | T | C | C | T | G | A | G | G | A | A | A | A | A | G | T | C | 0.14%           | VHLTPVEKSE | FALSE      |               |
| 15  | G | C | A | C | C | T | G | A | C | T | C | C | T | G | T | G | G | A | A | A | A | A | G | T | C | 0.11%           | VHLTPVEKSA | FALSE      | Sickle Allele |
| 16  | G | T | A | C | C | T | G | A | C | T | C | C | T | G | A | G | G | A | A | A | A | A | G | T | C | 0.10%           | VYLTPEEKSA | FALSE      |               |
| 17  | G | C | A | C | C | T | G | A | C | T | C | C | T | G | A | G | G | A | A | A | A | A | G | T | C | 0.09%           | VHLTPVEESA | FALSE      |               |
| 18  | G | C | A | C | C | T | G | A | C | T | C | C | T | G | A | G | G | A | A | A | A | A | G | T | C | 0.08%           | VHLTPVEKSA | FALSE      |               |
| 19  | G | C | A | C | C | T | G | A | C | T | C | C | T | G | A | G | G | A | A | A | A | A | G | T | C | 0.07%           | VHLTPVEKST | FALSE      |               |

Day 14 No BC

| HbS | G | C | A | C | C | T | G | A | C | T | C | C | T | G | T | G | G | A | G | A | A | G | T | C | T | Read Percentage | aa seq | correct aa |       |               |
|-----|---|---|---|---|---|---|---|---|---|---|---|---|---|---|---|---|---|---|---|---|---|---|---|---|---|-----------------|--------|------------|-------|---------------|
| 1   | G | C | A | C | C | T | G | A | C | T | C | C | T | G | A | G | A | A | A | A | A | A | G | T | C | C               | 94.12% | VHLTPVEKSA | TRUE  |               |
| 2   | G | C | A | C | C | T | G | A | C | T | C | C | T | G | T | G | G | A | A | A | A | A | G | T | C | C               | 1.11%  | VHLTPVEKSA | FALSE | Sickle Allele |
| 3   | G | C | A | C | C | T | G | A | C | T | C | C | T | G | T | G | G | A | A | A | A | A | G | T | C | C               | 1.11%  | VHLTPVEKSA | FALSE | Sickle Allele |
| 4   | G | C | A | C | C | T | G | A | C | T | C | C | T | G | A | G | G | A | A | A | A | A | G | T | C | C               | 0.34%  | VRLTPVEKSA | FALSE |               |
| 5   | G | C | A | C | C | T | G | A | C | T | C | C | T | G | A | G | G | A | A | A | A | A | G | T | C | C               | 0.32%  | VHLTPVEKSA | FALSE | Sickle Allele |
| 6   | G | C | A | C | C | C | G | A | C | T | C | C | T | G | A | G | G | A | A | A | A | A | G | T | C | C               | 0.31%  | VHPTPEEKSA | FALSE |               |
| 7   | G | C | A | C | C | T | G | A | C | T | C | C | T | G | A | G | G | A | A | A | A | A | G | T | C | C               | 0.29%  | AHLTPVEKSA | FALSE |               |
| 8   | G | C | A | C | C | T | G | A | C | T | C | C | T | G | A | G | G | A | A | A | A | A | G | T | C | C               | 0.24%  | VHLTPVEKSA | TRUE  |               |
| 9   | G | C | A | C | C | T | G | A | C | T | C | C | T | G | A | G | G | A | A | A | A | A | G | T | C | C               | 0.23%  | VHLTPVEKSA | TRUE  |               |
| 10  | G | C | A | C | C | T | G | A | C | T | C | C | T | G | G | G | A | A | A | A | A | A | G | T | C | C               | 0.23%  | VHLTPVEKSA | FALSE |               |
| 11  | G | C | A | C | C | T | G | A | C | T | C | C | T | G | A | G | G | A | A | A | A | A | G | T | C | C               | 0.22%  | VHLPVEKSA  | FALSE |               |
| 12  | G | C | A | C | C | T | G | A | C | T | C | C | T | G | A | G | G | A | A | A | A | A | G | T | C | C               | 0.18%  | VHLTPVEKSA | TRUE  |               |
| 13  | G | C | A | C | C | T | G | A | C | T | C | C | T | G | T | G | G | A | A | A | A | A | G | T | C | C               | 0.16%  | VHLTPVEKSA | FALSE | Sickle Allele |
| 14  | G | C | A | C | C | T | G | A | C | T | C | C | T | G | A | G | G | A | A | A | A | A | G | T | C | C               | 0.14%  | VHLTPVEKSA | FALSE |               |

Day 2 BC

| HbS | G | C | A | C | C | T | G | A | C | T | C | C | T | G | T | G | G | A | G | A | A | G | T | C | T | Read Percentage | aa seq | correct aa |       |               |
|-----|---|---|---|---|---|---|---|---|---|---|---|---|---|---|---|---|---|---|---|---|---|---|---|---|---|-----------------|--------|------------|-------|---------------|
| 1   | G | C | A | C | C | T | G | A | C | T | C | C | T | G | A | G | A | A | A | A | A | A | G | T | C | C               | 1.76%  | VHLTPVEKSA | TRUE  |               |
| 2   | G | C | A | C | C | T | G | A | C | T | C | C | T | G | T | G | G | A | A | A | A | A | G | T | C | C               | 1.31%  | VHLTPVEKSA | FALSE | Sickle Allele |
| 3   | T | C | A | T | T | A | A | C | A | C | C | A | G | A | G | G | A | A | A | A | A | A | G | T | C | T               | 0.71%  | VHLTPVEKSA | TRUE  |               |
| 4   | G | C | A | T | T | T | G | A | C | A | C | C | T | G | A | G | G | A | A | A | A | A | G | T | C | A               | 0.64%  | VHLTPVEKSA | TRUE  |               |
| 5   | G | C | A | T | T | T | G | A | C | T | C | C | A | G | A | G | G | A | A | A | A | A | G | T | C | T               | 0.37%  | VHLTPVEKSA | TRUE  |               |
| 6   | C | C | A | T | T | T | G | A | C | T | C | C | T | G | A | G | G | A | A | A | A | A | G | T | C | G               | 0.35%  | VHLTPVEKSA | TRUE  |               |
| 7   | A | C | A | T | T | T | G | A | C | A | C | C | T | G | A | A | G | A | A | A | A | A | G | T | C | T               | 0.33%  | VHLTPVEKSA | TRUE  |               |
| 8   | G | C | A | C | C | T | T | A | C | G | C | C | T | G | A | G | G | A | A | A | A | A | G | T | C | T               | 0.32%  | VHLTPVEKSA | TRUE  |               |
| 9   | C | C | A | T | T | T | G | A | C | T | C | C | A | G | A | G | G | A | A | A | A | A | G | T | C | A               | 0.31%  | VHLTPVEKSA | TRUE  |               |
| 10  | G | C | A | T | T | T | A | A | C | T | C | C | T | G | A | G | G | A | A | A | A | A | G | T | C | C               | 0.31%  | VHLTPVEKSA | TRUE  |               |
| 11  | A | C | A | T | T | T | A | A | C | A | C | C | A | G | A | G | A | A | A | A | A | A | G | T | C | C               | 0.31%  | VHLTPVEKSA | TRUE  |               |
| 12  | T | C | A | T | T | T | A | A | C | C | C | C | T | G | A | G | G | A | A | A | A | A | G | T | C | A               | 0.31%  | VHLTPVEKSA | TRUE  |               |
| 13  | A | C | A | T | T | T | A | A | C | T | C | C | T | G | A | G | G | A | A | A | A | A | G | T | C | G               | 0.29%  | VHLTPVEKSA | TRUE  |               |
| 14  | C | C | A | T | T | T | A | A | C | T | C | C | T | G | A | G | G | A | A | A | A | A | G | T | C | T               | 0.28%  | VHLTPVEKSA | TRUE  |               |
| 15  | A | C | A | T | T | T | G | A | C | A | C | C | C | A | G | A | G | A | A | A | A | A | G | T | C | A               | 0.28%  | VHLTPVEKSA | TRUE  |               |
| 16  | G | C | A | C | C | T | T | A | A | C | C | C | T | G | A | G | G | A | A | A | A | A | G | T | C | C               | 0.28%  | VHLTPVEKSA | TRUE  |               |
| 17  | T | C | A | T | T | T | G | A | C | T | C | C | T | G | A | G | G | A | A | A | A | A | G | A | G | T               | 0.26%  | VHLTPVEKSA | TRUE  |               |
| 18  | C | C | A | C | T | T | A | A | C | T | C | C | A | G | A | G | G | A | A | A | A | A | G | T | C | C               | 0.26%  | VHLTPVEKSA | TRUE  |               |
| 19  | T | C | A | C | T | T | G | A | C | A | C | C | T | G | A | G | G | A | A | A | A | A | G | A | G | C               | 0.26%  | VHLTPVEKSA | TRUE  |               |
| 20  | T | C | A | T | T | T | G | A | C | A | C | C | T | G | A | G | G | A | A | A | A | A | G | T | C | G               | 0.25%  | VHLTPVEKSA | TRUE  |               |

Day 14 BC

| HbS | G | C | A | C | C   | T | G | A | C | T | C | C | T | G | T | G | G | A | G | A | A | G | T | C | T | Read Percentage | aa seq | correct aa |            |               |  |
|-----|---|---|---|---|-----|---|---|---|---|---|---|---|---|---|---|---|---|---|---|---|---|---|---|---|---|-----------------|--------|------------|------------|---------------|--|
| 1   | G | C | A | C | C   | T | G | A | C | T | C | C | T | G | A | G | A | A | A | A | A | A | G | T | C | C               | 1.50%  | VHLTPVEKSA | TRUE       |               |  |
| 2   | G | C | A | C | C   | T | G | A | C | T | C | C | T | G | T | G | G | A | A | A | A | A | G | T | C | T               | 0.98%  | VHLTPVEKSA | FALSE      | Sickle Allele |  |
| 3   | G | C | A | T | C   | T | C | A | C | G | C | C | T | G | A | G | G | A | A | A | A | A | G | T | C | T               | 0.57%  | VHLTPVEKSA | TRUE       |               |  |
| 4   | T | C | A | T | T   | T | A | A | C | G | C | C | A | G | A | G | A | A | A | A | A | A | G | T | C | T               | 0.22%  | VHLTPVEKSA | TRUE       |               |  |
| 5   | C | C | A | C | T   | T | T | A | A | C | G | C | C | T | G | A | G | G | A | A | A | A | G | T | C | A               | 0.15%  | VHLTPVEKSA | TRUE       |               |  |
| 6   | C | C | A | T | C   | T | T | A | A | C | C | C | T | G | A | G | G | A | A | A | A | A | G | A | G | T               | 0.15%  | VHLTPVEKSA | TRUE       |               |  |
| 7   | G | C | A | C | T   | T | T | A | A | C | T | C | C | G | A | G | G | A | A | A | A | A | G | A | G | T               | 0.14%  | VHLTPVEKSA | TRUE       |               |  |
| 8   | T | C | A | C | T   | T | T | G | A | C | C | C | T | G | A | A | G | A | A | A | A | A | G | T | C | C               | 0.14%  | VHLTPVEKSA | TRUE       |               |  |
| 9   | G | C | A | T | C   | T | T | A | A | C | T | C | C | G | A | G | G | A | A | A | A | A | G | A | G | C               | 0.13%  | VHLTPVEKSA | TRUE       |               |  |
| 10  | G | C | A | C | C   | T | T | G | A | C | T | C | C | T | G | T | G | G | A | A | A | A | G | T | C | T               | 0.13%  | VHLTPVEKSA | FALSE      | Sickle Allele |  |
| 11  | T | C | A | C | T   | T | T | A | A | C | T | C | C | T | G | A | G | G | A | A | A | A | G | T | C | C               | 0.13%  | VHLTPVEKSA | TRUE       |               |  |
| 12  | A | C | A | C | T   | T | T | A | A | C | G | C | C | A | G | A | G | A | A | A | A | A | G | T | C | A               | 0.13%  | VHLTPVEKSA | TRUE       |               |  |
| 13  | A | C | A | T | T   | T | T | G | A | C | T | C | C | T | G | A | G | A | A | A | A | A | G | A | G | C               | 0.12%  | VHLTPVEKSA | TRUE       |               |  |
| 14  | A | C | A | T | T   | T | T | A | A | C | C | C | T | G | A | G | G | A | A | A | A | A | G | T | C | C               | 0.12%  | VHLTPVEKSA | TRUE       |               |  |
| 15  | T | C | A | T | T   | T | T | G | A | C | C | C | C | G | A | A | G | A | A | A | A | A | G | A | G | T               | G      | 0.12%      | VHLTPVEKSA | TRUE          |  |
| 16  | G | C | A | T | C</ |   |   |   |   |   |   |   |   |   |   |   |   |   |   |   |   |   |   |   |   |                 |        |            |            |               |  |

**Supplementary Table 3. Cell counts from each cord blood used for in vivo experiments**

| Cord Blood | Barcode Pools | Live Count | Viability | N= | Cells/Mouse |
|------------|---------------|------------|-----------|----|-------------|
| 1          | n/a           | 4.32E+05   | 70        | 1  | 4.3E+05     |
| 2          | n/a           | 3.56E+05   | 75        | 2  | 1.8E+05     |
| 3          | n/a           | 9.05E+05   | 90        | 2  | 4.5E+05     |
| 4          | non-BC        | 5.94E+05   | 95        | 2  | 3.0E+05     |
| 4          | BC1 + BC4     | 1.13E+06   | 88        | 2  | 5.7E+05     |
| 5          | non-BC        | 7.13E+05   | 86        | 2  | 3.6E+05     |
| 5          | BC1 + BC4     | 8.10E+05   | 85        | 2  | 4.1E+05     |
| 6          | non-BC        | 3.24E+05   | 76        | 1  | 3.2E+05     |
| 6          | BC1 + BC4     | 4.59E+05   | 78        | 1  | 4.6E+05     |
| 7          | non-BC        | 7.60E+05   | 70        | 2  | 2.39E+05    |
| 7          | BC1/BC2/BC4   | 1.20E+06   | 77        | 2  | 4.16E+05    |
| 8          | non-BC        | 7.80E+05   | 65        | 1  | 4.56E+05    |
| 8          | BC1/BC2/BC4   | 6.00E+05   | 82        | 1  | 4.43E+05    |
| 9          | non-BC        | 8.00E+05   | 74        | 2  | 2.66E+05    |
| 9          | BC1/BC2/BC4   | 7.30E+05   | 76        | 2  | 2.50E+05    |
| 9          | n/a           | 1.00E+06   | 65        | 2  | 2.76E+05    |
| 10         | n/a           | 6.75E+05   | 70        | 2  | 2.01E+05    |
| 11         | n/a           | 4.20E+05   | 70        | 1  | 2.50E+05    |

**Supplementary Table 4. HBB treated mouse BM-MNC subsets sorted as described in Supplementary Figure 2 for each indicated sample, with total sorted events and total genomic input into NGS workflow.**

| Week | MouseID      | Group       | Subset | Events Sorted | Genome Equivalents |
|------|--------------|-------------|--------|---------------|--------------------|
|      |              |             |        |               | NGS                |
| 12   | 20-Secondary | HBB-BC1/4   | HSPC   | 2316          | 231.6              |
| 12   | 20-Secondary | HBB-BC1/4   | 33+    | 229000        | 10000              |
| 12   | 20-Secondary | HBB-BC1/4   | 19+    | 600000        | 10000              |
| 18   | 13           | HBB-BC1/4   | HSPC   | 40000         | 4000               |
| 18   | 13           | HBB-BC1/4   | 33+    | 1000000       | 10000              |
| 18   | 13           | HBB-BC1/4   | 19+    | 1000000       | 10000              |
| 18   | 14           | HBB-BC1/4   | 19+    | 1000000       | 10000              |
| 18   | 14           | HBB-BC1/4   | HSPC   | 10000         | 1000               |
| 18   | 14           | HBB-BC1/4   | 33+    | 444000        | 10000              |
| 18   | 15           | HBB-BC1/4   | HSPC   | 7000          | 700                |
| 18   | 15           | HBB-BC1/4   | 33+    | 268000        | 10000              |
| 18   | 15           | HBB-BC1/4   | 19+    | 150000        | 10000              |
| 18   | 18           | HBB-BC1/4   | 19+    | 400000        | 10000              |
| 18   | 18           | HBB-BC1/4   | HSPC   | 23000         | 2300               |
| 18   | 18           | HBB-BC1/4   | 33+    | 500000        | 10000              |
| 18   | 20           | HBB-BC1/4   | 19+    | 650000        | 10000              |
| 18   | 20           | HBB-BC1/4   | HSPC   | 15000         | 1500               |
| 18   | 20           | HBB-BC1/4   | 33+    | 875000        | 10000              |
| 16   | 23           | HBB-BC1/2/4 | HSPC   | 1250          | 125                |
| 16   | 23           | HBB-BC1/2/4 | 33+    | 130000        | 10000              |
| 16   | 23           | HBB-BC1/2/4 | 19+    | 45000         | 4500               |
| 16   | 27           | HBB-BC1/2/4 | HSPC   | 5000          | 500                |
| 16   | 27           | HBB-BC1/2/4 | 33+    | 390000        | 10000              |
| 16   | 27           | HBB-BC1/2/4 | 19+    | 450000        | 10000              |
| 16   | 29           | HBB-BC1/2/4 | HSPC   | 0             | 0                  |
| 16   | 29           | HBB-BC1/2/4 | 33+    | 30000         | 3000               |
| 16   | 29           | HBB-BC1/2/4 | 19+    | 123000        | 10000              |
| 16   | 31           | HBB-BC1/2/4 | HSPC   | 0             | 0                  |
| 16   | 31           | HBB-BC1/2/4 | 33+    | 50000         | 5000               |
| 16   | 31           | HBB-BC1/2/4 | 19+    | 5000          | 500                |



**Supplementary Table 6. AAVS1-BFP treated mouse BM-MNC subsets sorted as described in Supplementary Figure 4**

| Week | MouseID     | Group             | Subset | Events Sorted | Genome Equivalents |
|------|-------------|-------------------|--------|---------------|--------------------|
|      |             |                   |        |               | NGS                |
| 18   | 3           | AAVS1-BFP-barcode | 33-Mid | 44000         | 4400               |
| 18   | 3           | AAVS1-BFP-barcode | 33-Hi  | 89000         | 8900               |
| 18   | 3           | AAVS1-BFP-barcode | 19+    | 307000        | 10000              |
| 12   | 3-Secondary | AAVS1-BFP-barcode | 33-Mid | 1400          | 140                |
| 12   | 3-Secondary | AAVS1-BFP-barcode | 19+    | 800           | 80                 |
| 12   | 3-Secondary | AAVS1-BFP-barcode | 33-Hi  | 11500         | 1150               |
| 18   | 7           | AAVS1-BFP-barcode | 33-Mid | 228000        | 10000              |
| 18   | 7           | AAVS1-BFP-barcode | 33-Hi  | 409000        | 10000              |
| 18   | 7           | AAVS1-BFP-barcode | 19+    | 1166000       | 10000              |
| 12   | 7-Secondary | AAVS1-BFP-barcode | 33-Mid | 23300         | 1553               |
| 12   | 7-Secondary | AAVS1-BFP-barcode | 19+    | 275000        | 10000              |
| 12   | 7-Secondary | AAVS1-BFP-barcode | 33-Hi  | 65000         | 4333               |
| 16   | 34          | AAVS1-BFP-barcode | 33-Mid | 56000         | 5600               |
| 16   | 34          | AAVS1-BFP-barcode | 33-Hi  | 61000         | 6100               |
| 16   | 34          | AAVS1-BFP-barcode | 19+    | 1000000       | 10000              |
| 16   | 38          | AAVS1-BFP-barcode | 33-Mid | 624           | 62.4               |
| 16   | 38          | AAVS1-BFP-barcode | 33-Hi  | 132           | 13.2               |
| 16   | 38          | AAVS1-BFP-barcode | 19+    | 51000         | 5100               |
| 16   | 40          | AAVS1-BFP-barcode | 33-Mid | 250000        | 10000              |
| 16   | 40          | AAVS1-BFP-barcode | 33-Hi  | 220000        | 10000              |
| 16   | 40          | AAVS1-BFP-barcode | 19+    | 3200000       | 10000              |

Total sorted events and total genomic input into NGS workflow. Note that CD33<sup>Hi</sup> and CD33<sup>Mid</sup> were combined for analyses.

Supplementary Table 7. BFP Bubble Plot Detailed Legend

|         |   |   |   |   |   |   |   |   |   | Mouse 3 |    | Mouse 3 |    | Mouse 7 |     | Mouse 7 |    | Mouse 34 |     | Mouse 38 |     | Mouse 40 |     |   |   |     |    |
|---------|---|---|---|---|---|---|---|---|---|---------|----|---------|----|---------|-----|---------|----|----------|-----|----------|-----|----------|-----|---|---|-----|----|
| Barcode |   |   |   |   |   |   |   |   |   | 19      | 33 | 19      | 33 | 19      | 33  | 19      | 33 | 19       | 33  | 19       | 33  | 19       | 33  |   |   |     |    |
| A       | A | G | G | A | C | G | T | A | A | A       | T  | 73      | *  | *       | *   | *       | *  | *        | *   | *        | *   | *        | *   | * | * |     |    |
| A       | C | A | G | A | T | A | C | A | A | G       | T  | 69      | *  | *       | *   | *       | *  | *        | *   | *        | *   | *        | *   | * | * | *   | *  |
| G       | T | G | C | G | T | A | G | C | C | G       | T  | 28      | 72 | *       | *   | *       | 4  | *        | *   | *        | *   | *        | *   | * | * | *   | *  |
| G       | T | T | C | A | T | G | C | C | C | G       | G  | 26      | 77 | *       | *   | *       | *  | *        | *   | *        | *   | *        | *   | * | * | *   | *  |
| C       | C | G | C | A | T | G | C | C | T | G       | T  | *       | 21 | *       | *   | *       | *  | *        | *   | *        | *   | *        | *   | * | * | *   | *  |
| C       | C | A | T | A | A | G | C | A | T | T       | C  | 1       | *  | 200     | 114 | *       | *  | *        | *   | *        | *   | *        | *   | * | * | *   | *  |
| A       | T | T | G | A | T | T | A | C | T | G       | *  | *       | *  | 57      | *   | *       | *  | *        | *   | *        | *   | *        | *   | * | * | *   |    |
| C       | A | G | G | C | A | A | T | G | T | G       | T  | *       | 20 | *       | 28  | *       | *  | *        | *   | *        | *   | *        | *   | * | * | *   | *  |
| A       | C | T | G | G | A | G | C | C | T | G       | T  | *       | *  | *       | *   | 110     | 79 | 199      | 143 | *        | *   | *        | *   | * | * | *   | *  |
| G       | C | A | G | A | C | G | C | A | T | T       | G  | *       | *  | *       | *   | 43      | 18 | *        | *   | *        | *   | *        | *   | * | * | *   | *  |
| C       | A | T | G | A | C | G | G | T | G | G       | *  | *       | *  | *       | 42  | 19      | *  | *        | *   | *        | *   | *        | *   | * | * | *   |    |
| G       | T | T | C | G | A | T | G | G | C | G       | G  | *       | *  | *       | *   | *       | 1  | *        | 16  | *        | *   | *        | *   | * | * | *   | *  |
| C       | T | T | C | A | T | G | C | A | C | T       | C  | *       | *  | *       | *   | *       | 10 | *        | 9   | *        | *   | *        | *   | * | * | *   | *  |
| G       | T | A | G | C | A | G | T | G | A | T       | G  | *       | *  | *       | *   | *       | *  | *        | *   | 198      | 199 | *        | *   | * | * | *   | *  |
| G       | C | A | G | C | A | G | T | G | A | T       | G  | *       | *  | *       | *   | *       | *  | *        | *   | *        | *   | 152      | *   | * | * | *   | *  |
| A       | C | G | T | A | T | G | G | A | T | G       | C  | *       | *  | *       | *   | *       | *  | *        | *   | *        | *   | 48       | *   | * | * | *   | *  |
| G       | T | A | G | G | T | G | G | A | A | G       | G  | *       | *  | *       | *   | *       | *  | *        | *   | *        | *   | *        | 200 | * | * | *   | *  |
| C       | A | G | G | G | C | T | T | G | T | G       | T  | *       | *  | *       | *   | *       | *  | *        | *   | *        | *   | *        | *   | * | * | 106 | 79 |
| G       | A | A | G | C | C | A | G | A | A | G       | G  | *       | *  | *       | *   | *       | *  | *        | *   | *        | *   | *        | *   | * | * | 93  | 94 |
| A       | A | A | T | G | C | A | T | G | T | G       | T  | *       | *  | *       | *   | *       | *  | *        | *   | *        | *   | *        | *   | * | * | *   | 26 |
|         |   |   |   |   | O | T | H | E | R |         |    |         |    | *       | 5   | *       | *  | 4        | 64  | *        | 30  | *        | *   | * | * | *   | *  |

BFP "Bubble plot" detailed legend. Total counts and barcode identities for barcodes depicted in Figure 5 and Supplementary Figure 5.
