# Supplementary material for: The TRACE-Seq method tracks recombination alleles and identifies clonal reconstitution dynamics of gene targeted human hematopoietic stem cells
Source: PubMed Central journal article supplement (PMC7817666; doi:10.1038/s41467-020-20792-y), 2021-01-20
Supplement: 41467_2020_20792_MOESM2_ESM.pdf [file 41467_2020_20792_MOESM2_ESM.pdf]

## **Description of Additional Supplementary Files**

Supplementary Data 1. Indel Frequencies - Frequencies of most common indels relative to HBB sgRNA breakpoint.
